# Supplementary material
Source: PubMed Central journal article supplement (PMC8947944)
Supplement: mmc1.pdf [file mmc1.pdf]

## Supplemental information

### **mRNA-1273 or mRNA-Omicron boost in vaccinated macaques elicits similar B cell expansion, neutralizing responses, and protection from Omicron**

**Matthew Gagne, Juan I. Moliva, Kathryn E. Foulds, Shayne F. Andrew, Barbara J. Flynn, Anne P. Werner, Danielle A. Wagner, I-Ting Teng, Bob C. Lin, Christopher Moore, Nazaire Jean-Baptiste, Robin Carroll, Stephanie L. Foster, Mit Patel, Madison Ellis, Venkata-Viswanadh Edara, Nahara Vargas Maldonado, Mahnaz Minai, Lauren McCormick, Christopher Cole Honeycutt, Bianca M. Nagata, Kevin W. Bock, Caitlyn N.M. Dulan, Jamilet Cordon, Dillon R. Flebbe, John-Paul M. Todd, Elizabeth McCarthy, Laurent Pessaint, Alex Van Ry, Brandon Narvaez, Daniel Valentin, Anthony Cook, Alan Dodson, Katelyn Steingrebe, Saule T. Nurmukhambetova, Sucheta Godbole, Amy R. Henry, Farida Laboune, Jesmine Roberts-Torres, Cynthia G. Lorang, Shivani Amin, Jessica Trost, Mursal Naisan, Manjula Basappa, Jacquelyn Willis, Lingshu Wang, Wei Shi, Nicole A. Doria-Rose, Yi Zhang, Eun Sung Yang, Kwanyee Leung, Sijy O'Dell, Stephen D. Schmidt, Adam S. Olia, Cuiping Liu, Darcy R. Harris, Gwo-Yu Chuang, Guillaume Stewart-Jones, Isabella Renzi, Yen-Ting Lai, Agata Malinowski, Kai Wu, John R. Mascola, Andrea Carfi, Peter D. Kwong, Darin K. Edwards, Mark G. Lewis, Hanne Andersen, Kizzmekia S. Corbett, Martha C. Nason, Adrian B. McDermott, Mehul S. Suthar, Ian N. Moore, Mario Roederer, Nancy J. Sullivan, Daniel C. Douek, and Robert A. Seder**

| <b>Vaccine</b>                      | <b>Substitutions/Deletions outside RBD</b>                                                                                                                                                                            | <b>Substitutions/Deletions in RBD</b>                                                                   |
|-------------------------------------|-----------------------------------------------------------------------------------------------------------------------------------------------------------------------------------------------------------------------|---------------------------------------------------------------------------------------------------------|
| <b>mRNA-1273.529 / mRNA-Omicron</b> | A67V, ΔH69, ΔV70, T95I, G142D, ΔV143, ΔY144, ΔY145, <b>N211I*</b> , <b>ΔL212*</b> , ins214EPE, T547K, D614G, H655Y, N679K, P681H, N764K, D796Y, N856K, Q954H, N969K, L981F<br><br><b>*Alternatively: ΔN211, L212I</b> | G339D, S371L, S373P, S375F, K417N, N440K, G446S, S477N, T478K, E484A, Q493K, G496S, Q498R, N501Y, Y505H |

**Table S1. Amino acid replacements in mRNA-Omicron, related to Figure 1**

All variant positions in reference to mRNA-1273.

| Assay                      | Primary Regimen | Variant      | W6                          |                               | W41                         |                               | Second Boost | Variant | W43                         |                               |     |
|----------------------------|-----------------|--------------|-----------------------------|-------------------------------|-----------------------------|-------------------------------|--------------|---------|-----------------------------|-------------------------------|-----|
|                            |                 |              | Reciprocal ID <sub>50</sub> | Fold change relative to D614G | Reciprocal ID <sub>50</sub> | Fold change relative to D614G |              |         | Reciprocal ID <sub>50</sub> | Fold change relative to D614G |     |
| Live Virus Neutralization  | mRNA-1273       | D614G        | 5556                        | (1.0)                         | 328                         | (1.0)                         | mRNA-1273    | D614G   | 7196                        | (1.0)                         |     |
|                            |                 |              | Delta                       | 3516                          | 1.6                         | 215                           |              | 1.5     | Delta                       | 5119                          | 1.4 |
|                            |                 |              | Beta                        | 905                           | 6.1                         | 86                            |              | 3.8     | Beta                        | 2650                          | 2.7 |
|                            |                 |              | Omicron                     | 110                           | 50.6                        | 33                            |              | 10.0    | Omicron                     | 898                           | 8.0 |
|                            |                 | mRNA-Omicron | D614G                       | 4289                          | (1.0)                       | mRNA-Omicron                  | D614G        | 4289    | (1.0)                       |                               |     |
|                            |                 |              | Delta                       | 3559                          | 1.2                         |                               | Delta        | 3559    | 1.2                         |                               |     |
|                            |                 |              | Beta                        | 1166                          | 3.7                         |                               | Beta         | 1166    | 3.7                         |                               |     |
|                            |                 |              | Omicron                     | 562                           | 7.6                         |                               | Omicron      | 562     | 7.6                         |                               |     |
| Pseudovirus Neutralization | mRNA-1273       | D614G        | 4763                        | (1.0)                         | 266                         | (1.0)                         | mRNA-1273    | D614G   | 5356                        | (1.0)                         |     |
|                            |                 |              | Delta                       | 1988                          | 2.4                         | 164                           |              | 1.6     | Delta                       | 3198                          | 1.7 |
|                            |                 |              | Beta                        | 507                           | 9.4                         | 109                           |              | 2.4     | Beta                        | 3093                          | 1.7 |
|                            |                 |              | Omicron                     | 319                           | 14.9                        | 110                           |              | 2.4     | Omicron                     | 2981                          | 1.8 |
|                            |                 | mRNA-Omicron | D614G                       | 2667                          | (1.0)                       | mRNA-Omicron                  | D614G        | 2667    | (1.0)                       |                               |     |
|                            |                 |              | Delta                       | 2083                          | 1.3                         |                               | Delta        | 2083    | 1.3                         |                               |     |
|                            |                 |              | Beta                        | 1381                          | 1.9                         |                               | Beta         | 1381    | 1.9                         |                               |     |
|                            |                 |              | Omicron                     | 1927                          | 1.4                         |                               | Omicron      | 1927    | 1.4                         |                               |     |

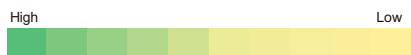

**Table S2. Reciprocal ID<sub>50</sub> geometric mean values and fold changes relative to D614G for live virus and pseudovirus neutralization values, related to Figure 1**

NHP were immunized according to Fig. S1A. The values for reciprocal ID<sub>50</sub> and fold change relative to D614G at weeks 6 and 41 are the geometric mean of 8 animals, while the values at week 43 are the geometric mean of 4 animals. Conditional formatting applied to each individual assay.

| <b>Variant</b> | <b>Substitutions/Deletions outside RBD</b>                                                                                                               | <b>Substitutions/Deletions in RBD</b>                                                                   |
|----------------|----------------------------------------------------------------------------------------------------------------------------------------------------------|---------------------------------------------------------------------------------------------------------|
| <b>WA1</b>     | None                                                                                                                                                     | None                                                                                                    |
| <b>D614G</b>   | D614G                                                                                                                                                    | None                                                                                                    |
| <b>Delta</b>   | T19R, G142D, ΔE156, ΔF157, R158G, D614G, P681R, D950N                                                                                                    | L452R, T478K                                                                                            |
| <b>Beta</b>    | L18F, D80A, D215G, ΔL242-244, R246I, D614G, A701V                                                                                                        | K417N, E484K, N501Y                                                                                     |
| <b>Omicron</b> | A67V, ΔH69, ΔV70, T95I, G142D, ΔV143, ΔY144, ΔY145, N211I, ΔL212, ins214EPE, T547K, D614G, H655Y, N679K, P681H, N764K, D796Y, N856K, Q954H, N969K, L981F | G339D, S371L, S373P, S375F, K417N, N440K, G446S, S477N, T478K, E484A, Q493R, G496S, Q498R, N501Y, Y505H |

**Table S3. List of amino acid replacements in variant-specific S-2P-ACE2 inhibition assays and B cell probes, related to Figure 2**

All variant positions in reference to Wuhan-Hu-1 sequence (Genbank: NC\_045512). All S-2P constructs contained furin substitution (GSAS at positions 682-685) and 2P stabilization (K986P and V987P).
